# Supplementary material for: Comparative Transcriptome Profiling of Chilling Stress Responsiveness in Two Contrasting Rice Genotypes
Source: PLoS One. 2012 Aug 17;7(8):e43274. doi: 10.1371/journal.pone.0043274 (PMC3422246; doi:10.1371/journal.pone.0043274)
Supplement: Table S3 — LTH-repressed genes compared with IR29 under control conditions. (XLS) [file pone.0043274.s005.xls]

## Sheet: Table S3
Table S3. LTH-repressed genes compared with IR29 under control condition
Gene Name	Fold Change	Function Anotation
Os01g0369900	0.177187	12-oxophytodienoate reductase 1, putative, expressed
Os05g0408900	0.340507	1-deoxy-D-xylulose-5-phosphate synthase, chloroplast, putative, expressed
Os05g0348100	0.395626	expressed protein
Os01g0924800	0.212876	60S ribosomal protein L7a, putative, expressed
Os04g0588600	0.422841	ABC transporter family protein, expressed
Os01g0695700	0.202943	ABC transporter family protein, expressed
Os03g0820500	0.346774	Actin-depolymerizing factor 3, putative, expressed
Os02g0731200	0.0699835	Agamous-like MADS box protein AGL21, putative, expressed
Os06g0600700	0.438834	Agenet domain containing protein, expressed
Os06g0196300	0.308575	AhpC/TSA family protein, expressed
Os11g0210600	0.139423	Alcohol dehydrogenase 2, putative, expressed
Os01g0266600	0.288874	Alkyl hydroperoxide reductase
Os01g0717400	0.209398	Allinase, C-terminal domain containing protein, expressed
Os12g0630500	0.24592	Alpha-amylase/trypsin inhibitor, putative, expressed
Os12g0448900	0.0523086	alpha-dioxygenase, putative, expressed
Os07g0280200	0.117902	AMP-binding enzyme family protein, expressed
LOC_Os02g292	0.255395	ankyrin repeat protein FPV115, putative, expressed
Os01g0188900	0.386204	Ankyrin-like protein.
Os01g0735500	0.159205	Anthocyanidin 5,3-O-glucosyltransferase, putative, expressed
Os03g0151100	0.190086	Appr-1-p processing enzyme family protein, expressed
Os02g0823100	0.413498	Aquaporin RWC3, putative, expressed
LOC_Os12g34110	0.33385	ATP synthase subunit C family protein
Os08g0109400	0.351171	AUX/IAA family protein, expressed
Os01g0818000	0.380313	auxin efflux carrier family protein, putative, expressed
Os02g0769100	0.37171	Auxin responsive protein, expressed
Os01g0124000	0.228836	Bowman-Birk type bran trypsin inhibitor precursor, putative, expressed
Os01g0128800	0.425697	C2 domain containing protein, expressed
Os06g0278000	0.101305	Carboxyl-terminal peptidase, putative, expressed
Os02g0175000	0.215453	Cation transport protein, expressed
Os01g0532600	0.267866	Cation transport protein, expressed
Os03g0696300	0.389403	CCAAT-binding transcription factor subunit B family protein, expressed
Os03g0647600	0.356868	CCAAT-binding transcription factor subunit B family protein, expressed
Os04g0429600	0.00506478	cellulose synthase family protein, putative, expressed
Os01g0923600	0.354867	CG-1 domain containing protein, expressed
Os02g0320300	0.208323	chalcone isomerase 3, putative, expressed
Os10g0542900	0.211328	Chitinase class I family protein
Os04g0387500	0.295718	Conserved hypothetical protein.
Os04g0499800	0.28547	Conserved hypothetical protein.
Os03g0816200	0.246015	Conserved hypothetical protein.
Os04g0587500	0.190927	Conserved hypothetical protein.
Os09g0453100	0.0445782	Conserved hypothetical protein.
Os04g0450800	0.397695	Core histone H2A/H2B/H3/H4 family protein, expressed
Os04g0120100	0.120261	Cucumisin precursor, putative, expressed
Os09g0110300	0.250835	cyclase family protein, putative, expressed
Os01g0227500	0.370079	Cytochrome P450 family protein, expressed
Os12g0268000	0.356455	Cytochrome P450 family protein, expressed
Os09g0441400	0.318918	Cytochrome P450 family protein, expressed
Os05g0101600	0.249362	Cytochrome P450 family protein, expressed
Os02g0185300	0.237369	Cytochrome P450 family protein, expressed
Os02g0504000	0.192169	Cytochrome P450 family protein, expressed
Os11g0487600	0.167844	Cytochrome P450 family protein, expressed
Os01g0227800	0.147011	Cytochrome P450 family protein, expressed
Os02g0503900	0.106717	Cytochrome P450 family protein, expressed
Os09g0275400	0.0045657	Cytochrome P450 family protein, expressed
Os01g0227500	0.418496	Cytochrome P450 family protein, expressed
Os03g0371400	0.32581	Cytochrome P450 family protein.
Os01g0940000	0.279332	Cytokinin dehydrogenase 1 precursor, putative, expressed
Os11g0615800	0.327967	DNA repair protein RAD51 homolog A, putative, expressed
Os04g0237300	0.378491	DNA-directed RNA polymerase alpha chain, putative
Os04g0227500	0.428927	DSBA-like thioredoxin domain containing protein, expressed
Os08g0238600	0.258373	Endo-1,3;1,4-beta-D-glucanase precursor, putative, expressed
Os11g0275000	0.274703	Endo-1,3;1,4-beta-D-glucanase precursor, putative, expressed
Os10g0498300	0.0877367	epoxide hydrolase, putative, expressed
Os09g0460700	0.382757	esterase, putative, expressed
Os06g0268700	0.240372	Eukaryotic aspartyl protease family protein, expressed
Os02g0533300	0.319543	Eukaryotic-type carbonic anhydrase family protein, expressed
Os06g0549700	0.442373	expressed protein
Os01g0238200	0.433745	expressed protein
Os12g0244500	0.406919	expressed protein
Os03g0774600	0.40231	expressed protein
Os06g0605600	0.37954	expressed protein
Os01g0712600	0.379487	expressed protein
Os01g0639600	0.371612	expressed protein
Os02g0147700	0.37027	expressed protein
Os06g0672700	0.368551	expressed protein
Os01g0839200	0.349543	expressed protein
Os12g0298600	0.347	expressed protein
Os02g0142800	0.343035	expressed protein
Os06g0694400	0.331913	expressed protein
Os06g0294000	0.322436	expressed protein
Os06g0493100	0.320424	expressed protein
Os02g0126600	0.312653	expressed protein
Os05g0568800	0.311991	expressed protein
Os05g0142000	0.310827	expressed protein
Os07g0605400	0.309737	expressed protein
LOC_Os01g08300	0.309013	expressed protein
Os07g0475000	0.30149	expressed protein
Os11g0544000	0.301486	expressed protein
Os03g0295300	0.287386	expressed protein
Os05g0552100	0.280157	expressed protein
Os04g0576700	0.275067	expressed protein
Os07g0151800	0.221028	expressed protein
Os10g0580500	0.206017	expressed protein
Os12g0145400	0.201995	expressed protein
Os12g0285500	0.200617	expressed protein
Os09g0304800	0.196823	expressed protein
Os03g0800400	0.193432	expressed protein
Os11g0678200	0.18626	expressed protein
Os07g0137600	0.151786	expressed protein
Os10g0570200	0.135574	expressed protein
Os05g0142200	0.129796	expressed protein
Os02g0162600	0.123604	expressed protein
Os03g0431600	0.120099	expressed protein
Os04g0142400	0.112207	expressed protein
Os08g0351300	0.110954	expressed protein
Os03g0661800	0.101574	expressed protein
Os02g0258800	0.101189	expressed protein
Os03g0789900	0.0928437	expressed protein
Os12g0590400	0.0840307	expressed protein
Os08g0233300	0.0267314	expressed protein
LOC_Os05g01330	0.0262415	expressed protein
Os01g0122000	0.0206816	expressed protein
Os05g0217700	0.00568051	expressed protein
Os01g0695300	0.146125	Farnesyl pyrophosphate synthetase, putative, expressed
Os06g0161300	0.417564	F-box domain containing protein, expressed
Os04g0578600	0.357981	ferric-chelate reductase, putative, expressed
Os10g0317900	0.200769	Flavonoid 3'-monooxygenase (EC 1.14.13.21)
Os12g0123500	0.372189	GDA1/CD39 family protein, expressed
LOC_Os08g01610	0.0711465	GDP-mannose transporter, putative, expressed
Os01g0649900	0.315103	GDSL-like Lipase/Acylhydrolase family protein, expressed
Os08g0478800	0.336536	Glucose-6-phosphate isomerase, putative, expressed
Os03g0757200	0.214106	Glucosyl transferase, putative, expressed
Os01g0271200	0.0982864	glutamyl-tRNA synthetase family protein, expressed
Os01g0371200	0.252204	glutathione S-transferase GSTF1, putative, expressed
Os01g0692000	0.190668	Glutathione S-transferase
Os04g0513400	0.280113	Glycosyl hydrolase family 1 protein, expressed
Os01g0840100	0.420238	Heat shock cognate 70 kDa protein, putative, expressed
Os05g0519700	0.154689	Heat shock protein 101, putative, expressed
Os02g0232000	0.204963	HSF-type DNA-binding domain containing protein, expressed
Os01g0826000	0.297993	heavy metal-associated domain containing protein, expressed
Os02g0584800	0.296448	heavy metal-associated domain containing protein, expressed
Os01g0927300	0.230883	heavy metal-associated domain containing protein, expressed
Os04g0196600	0.352866	HGA1, putative, expressed
Os04g0541700	0.351026	Homeobox domain containing protein, expressed
Os03g0684800	0.366149	HPP family protein, expressed
Os11g0119100	0.170912	hydrolase, alpha/beta fold family protein, expressed
Os04g0411700	0.251529	hydrolase, alpha/beta fold family protein, putative, expressed
Os01g0214500	0.274153	hypothetical protein
LOC_Os04g34220	0.228685	hypothetical protein
Os07g0484600	0.205613	hypothetical protein
Os05g0542300	0.200852	hypothetical protein
Os03g0127000	0.197351	hypothetical protein
LOC_Os05g03960	0.142255	hypothetical protein
Os02g0212500	0.139323	hypothetical protein
Os02g0300000	0.0708038	hypothetical protein
LOC_Os04g109	0.0697615	hypothetical protein
Os12g0534700	0.274881	hypothetical protein
Os06g0647500	0.35183	Hypothetical protein.
Os02g0701700	0.23596	Hypothetical protein.
Os03g0387900	0.202345	Hypothetical protein.
Os05g0348100	0.169736	Hypothetical protein.
Os01g0106300	0.276875	Isoflavone reductase homolog IRL, putative, expressed
Os12g0485800	0.346541	KE2 family protein, expressed
Os09g0339000	0.172314	lectin protein kinase, putative, expressed
Os02g0241100	0.377388	Leucine Rich Repeat family protein, expressed
Os01g0686200	0.158455	Limonoid UDP-glucosyltransferase, putative, expressed
Os03g0609500	0.290089	LOB domain protein 40, putative, expressed
Os06g0712700	0.283193	MADS-box transcription factor 16, putative, expressed
Os07g0605200	0.106435	MADS-box transcription factor 18, putative, expressed
Os12g0133100	0.35183	Major facilitator superfamily protein.
LOC_Os03g08910	0.101789	MatE family protein, expressed
Os02g0681000	0.219713	Mechanosensitive ion channel family protein, expressed
Os02g0829600	0.193989	metallo-beta-lactamase family protein, putative, expressed
Os05g0214300	0.126106	MtN3/saliva family protein, expressed
Os02g0706400	0.273039	Myb, DNA-binding domain containing protein.
Os11g0126900	0.279419	NAC domain transcription factor, putative, expressed
Os04g0630400	0.392259	NAD dependent epimerase/dehydratase family protein, expressed
LOC_Os06g390	0.36977	NAD dependent epimerase/dehydratase family protein, expressed
Os04g0447700	0.364878	NADH-dependent oxidoreductase 2, putative, expressed
Os10g0113900	0.269869	NADH-dependent oxidoreductase 2, putative, expressed
Os12g0438300	0.401449	NB-ARC domain containing protein, expressed
Os11g0226700	0.212992	NB-ARC domain containing protein, expressed
Os11g0226800	0.128989	NB-ARC domain containing protein, expressed
Os05g0568100	0.154702	NifU-like N-terminal domain containing protein, mitochondrial precursor
Os05g0409500	0.356641	nodulin, putative, expressed
Os11g0125900	0.142271	Nucleoside phosphatase GDA1/CD39 family protein
Os08g0560000	0.356206	oxidoreductase, 2OG-Fe oxygenase family protein, expressed
Os06g0255000	0.241087	oxidoreductase, 2OG-Fe oxygenase family protein, expressed
Os03g0618300	0.206554	oxidoreductase, 2OG-Fe oxygenase family protein, expressed
Os04g0291100	0.336862	oxidoreductase, short chain dehydrogenase/reductase family protein, expressed
Os12g0285600	0.163673	Oxysterol-binding protein, expressed
Os09g0564000	0.0562057	Papain family cysteine protease containing protein, expressed
Os03g0576400	0.204961	PCI domain containing protein, expressed
Os07g0546600	0.425629	Peptide chain release factor 2, putative, expressed
Os03g0235300	0.288728	Peptide transporter PTR2, putative, expressed
Os10g0154700	0.0436451	Peptidyl-prolyl cis-trans isomerase, putative, expressed
Os01g0962700	0.373309	Peroxidase 12 precursor, putative, expressed
Os07g0677100	0.235803	Peroxidase 2 precursor, putative, expressed
Os01g0266500	0.311405	Phenazine biosynthesis PhzC/PhzF protein family protein.
Os02g0756800	0.187999	Phi-1-like phosphate-induced protein, putative, expressed
Os09g0454600	0.376899	Phosphate carrier protein, mitochondrial precursor, putative, expressed
LOC_Os02g24630	0.386247	Photosystem II D2 protein, putative, expressed
LOC_Os04g16770	0.319364	Photosystem Q, putative, expressed
Os01g0851100	0.312531	Plant protein family protein, expressed
Os06g0514800	0.0591476	Plant thionin family protein, expressed
Os06g0681200	0.228333	Plastocyanin-like domain containing protein, expressed
Os03g0854800	0.376274	Poly polymerase catalytic domain containing protein, expressed
Os06g0589700	0.0754583	Polyadenylate-binding protein/Hyperplastic disc protein domain containing protein
Os12g0638200	0.267383	POT family protein, expressed
Os07g0162500	0.371749	PrMC3, putative, expressed
Os09g0326800	0.11243	Proteasome/cyclosome repeat family protein, expressed
Os02g0177900	0.425463	Protein kinase domain containing protein, expressed
Os01g0818600	0.419865	Protein kinase domain containing protein, expressed
Os01g0223700	0.339985	Protein kinase domain containing protein, expressed
Os08g0441100	0.249722	Protein kinase domain containing protein, expressed
Os04g0370900	0.199586	Protein kinase domain containing protein, expressed
Os06g0693000	0.189621	Protein kinase domain containing protein, expressed
Os05g0317900	0.1451	Protein kinase domain containing protein, expressed
Os06g0551800	0.121084	Protein kinase domain containing protein, expressed
Os04g0632600	0.0480828	Protein kinase domain containing protein, expressed
Os11g0470500	0.0465293	Protein of unknown function DUF26 domain containing protein.
Os06g0538900	0.0189698	Protein of unknown function DUF538 family protein.
Os03g0269900	0.266067	Protein of unknown function DUF604 family protein.
Os06g0268800	0.123467	Protein of unknown function UPF0005 family protein.
Os03g0830300	0.30156	Protein of unknown function, DUF614 containing protein
Os05g0537400	0.382029	Protein phosphatase 2C ABI2, putative, expressed
Os09g0325700	0.252085	Protein phosphatase 2C, putative, expressed
Os01g0684800	0.0839049	protein prenyltransferase alpha subunit, putative, expressed
Os02g0644600	0.116799	Protein prenyltransferase domain containing protein.
Os01g0160100	0.416272	Pyruvate decarboxylase isozyme 1, putative, expressed
Os01g0115700	0.112334	receptor-like kinase, putative, expressed
Os05g0161500	0.346943	RelA/SpoT containing protein, expressed
Os01g0139000	0.319584	Reticulon family protein, expressed
Os01g0591000	0.227225	Retinal dehydrogenase 1, putative, expressed
LOC_Os06g27680	0.277121	retrotransposon protein, putative, Ty1-copia subclass, expressed
Os07g0683600	0.145839	retrotransposon protein, putative, unclassified
LOC_Os08g10250	0.0424507	retrotransposon protein, putative, unclassified, expressed
Os09g0537700	0.270619	Ribonuclease T2 family protein, expressed
Os09g0538000	0.169436	Ribonuclease T2 family protein, expressed
LOC_Os03g52040	0.309443	Serine carboxypeptidase family protein, expressed
Os02g0634700	0.315497	Serine carboxypeptidase II precursor, putative, expressed
Os07g0656900	0.349123	Serine carboxypeptidase II-3 precursor, putative, expressed
Os05g0429000	0.253573	Serine hydroxymethyltransferase, mitochondrial precursor, putative, expressed
Os08g0203300	0.194387	SHR5-receptor-like kinase, putative, expressed
Os11g0572400	0.217912	sialyltransferase, putative, expressed
Os12g0594600	0.045424	Skp1 family, dimerisation domain containing protein, expressed
Os12g0298600	0.340881	expressed protein
Os02g0314300	0.274141	Sodium/calcium exchanger membrane region domain containing protein
Os06g0160700	0.304962	Soluble starch synthase 1, chloroplast precursor, putative, expressed
Os06g0483200	0.0408014	squalene/oxidosqualene cyclases family protein
Os06g0217300	0.262663	SRF-type transcription factor family protein, expressed
Os03g0197200	0.154059	Sugar transporter family protein, expressed
Os03g0843800	0.245057	Thiopurine S-methyltransferase family protein, expressed
Os01g0794400	0.197069	Thioredoxin domain 2 containing protein.
Os03g0325500	0.392626	transfactor, putative, expressed
Os02g0485000	0.122744	Transferase family protein, expressed
Os04g0650700	0.372069	transposon protein, putative, unclassified
Os02g0661100	0.20827	trehalose-phosphatase family protein, expressed
Os10g0378300	0.207618	Truncated copper-binding protein CUTA.
Os03g0583900	0.440858	Type III restriction enzyme, res subunit family protein, expressed
Os01g0607300	0.321233	ubiquitin, putative, expressed
Os01g0962400	0.360637	ubiquitin-fold modifier 1 precursor, putative, expressed
Os01g0734800	0.307402	UDP-glucoronosyl and UDP-glucosyl transferase family protein, expressed
Os07g0489300	0.12695	UDP-glucoronosyl and UDP-glucosyl transferase family protein, expressed
Os09g0361700	0.41929	Uncharacterised protein family containing protein, expressed
Os01g0170600	0.104337	universal stress protein family protein, expressed
Os05g0322900	0.207286	WRKY DNA binding domain containing protein, expressed
Os09g0417600	0.126766	WRKY DNA binding domain containing protein, expressed
Os12g0116600	0.266059	WRKY DNA binding domain containing protein, expressed
Os03g0312600	0.29095	XPA-binding protein 1, putative, expressed
Os01g0871200	0.438096	zinc finger family protein, putative, expressed
OSAFFX.8236.1.A1_X_AT	0.340913	unknown
OsAffx.32299.1.S1_at	0.314909	unknown
OS.37673.1.S1_AT	0.304057	unknown
OS.5403.1.S1_AT	0.301269	unknown
OS.18194.1.S1_AT	0.298543	unknown
OsAffx.32239.1.S1_at	0.289966	unknown
OS.17263.1.S1_AT	0.280928	unknown
OSAFFX.32346.1.S1_AT	0.275094	unknown
OS.57197.1.S1_AT	0.274961	unknown
OS.26976.1.A1_AT	0.252197	unknown
OS.6584.1.S1_AT	0.232004	unknown
OSAFFX.21964.1.S1_AT	0.219688	unknown
OS.39000.1.S1_AT	0.189877	unknown
OS.8878.1.S1_AT	0.184205	unknown
OSAFFX.30777.1.A1_AT	0.158835	unknown
Os.48833.1.A1_s_at	0.134122	unknown
OsAffx.32235.1.S1_x_at	0.0974889	unknown
OSAFFX.19388.1.S1_S_AT	0.075084	unknown
OS.20171.1.S1_AT	0.0345439	unknown
