# Supplementary material for: Comparative Transcriptome Profiling of Chilling Stress Responsiveness in Two Contrasting Rice Genotypes
Source: PLoS One. 2012 Aug 17;7(8):e43274. doi: 10.1371/journal.pone.0043274 (PMC3422246; doi:10.1371/journal.pone.0043274)
Supplement: Table S16 — List of differentially-regulated genes mapped to previously detected QTL intervals. (XLS) [file pone.0043274.s018.xls]

## Sheet: Table S16
Table S16. List of differentially regulated genes on the previously detected QTL intervals
QTL description	LOC GI	Function Anotation	LTH*	IR29
qCTB1, spikelet fertility, RM151–RM259	LOC_Os01g10680	expressed protein	LR↑
	LOC_Os01g10800	pentatricopeptide		ER↓
	LOC_Os01g10820	60S ribosomal protein L11	ER↓
36 genes	LOC_Os01g11010	Peptide-N4-asparagine amidase A		ER ↑
	LOC_Os01g11054	Phosphoenolpyruvate-carboxylase		LR↓
	LOC_Os01g11070	curculin-like lectin family protein	LR↓	LR↓
	LOC_Os01g11110	14-3-3 protein	LR↑
	LOC_Os01g11120	RNA-binding protein	LR↓
	LOC_Os01g11150	oxidoreductase, 2OG-Fe oxygenase family protein	ER ↑	ER ↑
	LOC_Os01g11160	Amino acid permease family protein	ER ↑
	LOC_Os01g11414	Calcium-binding EF-hand domain containing protein.		LR↑
	LOC_Os01g11460	Zinc finger, C3HC4 type family protein	LR↑	LR↑
	LOC_Os01g11520	Zinc finger, C3HC4 type family protein	ER ↑	ER ↑
	LOC_Os01g11600	hypothetical protein	ER ↑	ER ↑
	LOC_Os01g11650	GDSL-like Lipase/Acylhydrolase family protein		LR↓
	LOC_Os01g11946	Sugar transporter superfamily protein.		LR↓
	LOC_Os01g11960	PHD-finger family protein	LR↓	LR↓
	LOC_Os01g12060	hypothetical protein	ER ↑
	LOC_Os01g12190	expressed protein		LR↓
	LOC_Os01g12200	expressed protein		LR↓
	LOC_Os01g12270	expressed protein	LR↓
	LOC_Os01g12320	GDSL-like Lipase/Acylhydrolase family protein	ER↓
	LOC_Os01g12400	Protein kinase domain containing protein		LR↓
	LOC_Os01g12650	reticulon family protein	ER↓
	LOC_Os01g12690	uncharacterized plant-specific domain		LR↑
	LOC_Os01g12710	oxidoreductase	ER ↑
	LOC_Os01g12740	Cytochrome P450 family protein		ER↓
	LOC_Os01g12750	Cytochrome P450 family protein		ER↓
	LOC_Os01g12770	Cytochrome P450 family protein		ER ↑
	LOC_Os01g12830	NAD binding domain containing protein	LR↓
	LOC_Os01g12890	expressed protein	LR↑
	LOC_Os01g12920	thioesterase family protein	LR↓	LR↓
	LOC_Os01g13000	ethylene-responsive family protein		LR↓
	LOC_Os01g13080	60S acidic ribosomal protein P3	ER↓	ER↓
	LOC_Os01g13120	MIP family channel proteins containing protein		ER↓
	LOC_Os01g13190	Histidinol dehydrogenase, chloroplast precursor	LR↓
qCTS1, Cold tolerance, RM297-RM319	LOC_Os01g55870	Chorismate mutase, chloroplast precursor		LR↓
	LOC_Os01g55940	indole-3-acetic acid-amido synthetase GH3.1		ER ↑
	LOC_Os01g56070	Zinc finger, C3HC4 type family protein	ER ↑
28 genes	LOC_Os01g56150	Serine carboxypeptidase S28 family protein	LR↓
	LOC_Os01g56180	expressed protein		LR↓
	LOC_Os01g56300	expressed protein	LR↑
	LOC_Os01g56330	protein kinase family protein		LR↑
	LOC_Os01g56350	expressed protein	ER↓
	LOC_Os01g56390	F-box domain containing protein	LR↑
	LOC_Os01g56420	Ctr copper transporter family protein
	LOC_Os01g56470	Mal d 1-associated protein		LR↓
	LOC_Os01g56790	expressed protein	ER ↑	ER ↑
	LOC_Os01g56850	expressed protein	LR↑
	LOC_Os01g56880	expressed protein
	LOC_Os01g56890	expressed protein	ER ↑	ER ↑
	LOC_Os01g56940	XPG I-region family protein	LR↑
	LOC_Os01g57110	SNF2 domain-containing protein	LR↑
	LOC_Os01g57350	Diacylglycerol kinase catalytic domain family protein		ER ↑
	LOC_Os01g57420	diacylglycerol kinase variant B		ER ↑
	LOC_Os01g57730	Peroxidase family protein		LR↑
	LOC_Os01g57940	Serine/threonine-protein kinase RLCKVII	LR↑	LR↑
	LOC_Os01g58010	ATP synthase a chain		LR↑
	LOC_Os01g58020	Ribulose bisphosphate carboxylase		LR↑
	LOC_Os01g58080	membrane-associated salt-inducible protein	LR↓
	LOC_Os01g58130	expressed protein		ER ↑
	LOC_Os01g58140	expressed protein	ER ↑	ER ↑
	LOC_Os01g58150	expressed protein	ER ↑	ER ↑
	LOC_Os01g58194	Thioredoxin domain 2 containing protein.		LR↓
qCTB5, undeveloped spikelet, RM26–RM334	LOC_Os02g19924	Conserved hypothetical protein.	LR↓
	LOC_Os02g20040	transposon protein , CACTA, En/Spm sub-class		LR↓
	LOC_Os02g20560	Fasciclin domain containing protein	ER↓
3 genes
qPSST-3, reproductive stage, RM569-RM231	LOC_Os03g04240	Glutathione S-transferase	ER↓
	LOC_Os03g04250	Glutathione S-transferase		LR↑
	LOC_Os03g04300	Ankyrin repeat protein, chloroplast precursor	LR↓
	LOC_Os03g04340	24-methylenesterol C-methyltransferase 2		ER↓
11 genes	LOC_Os03g04430	protein phosphatase 2C homolog	LR↑
	LOC_Os03g04440	expressed protein		LR↓
	LOC_Os03g04580	expressed protein	ER↓
	LOC_Os03g04600	expressed protein	LR↑
	LOC_Os03g04610	expressed protein		LR↓
	LOC_Os03g04750	60S ribosomal protein L21		ER↓
	LOC_Os03g04920	ABC transporter family protein	LR↑
qCTS3,cold tolerance, RM200-RM85	LOC_Os03g63680	expressed protein		ER↓
	LOC_Os03g63700	Uncharacterised protein family containing protein		LR↓
	LOC_Os03g63920	Ku domain containing protein.		LR↓
5 genes	LOC_Os03g63930	Acyl carrier protein III, chloroplast precursor	LR↓
	LOC_Os03g64200	ABC transporter family protein		LR↑
qCTS4-1, cold tolerance, RM335-RM261	LOC_Os04g02620	oxidoreductase	LR↓
	LOC_Os04g02830	Peptidyl-prolyl cis-trans isomerase 1		ER↓
	LOC_Os04g02900	Pyruvate dehydrogenase E1	ER ↑	ER ↑
24 genes	LOC_Os04g02910	membrane related protein CP5
	LOC_Os04g02970	Cucumisin precursor		LR↓
	LOC_Os04g03796	Subtilase.		LR↓
	LOC_Os04g03980	flavin-containing monooxygenase YUCCA3	ER ↑	ER ↑
	LOC_Os04g04010	expressed protein		LR↓
	LOC_Os04g05010	CBS domain containing protein	ER↓	ER↓
	LOC_Os04g05080	expressed protein	LR↓	LR↓
	LOC_Os04g05550	hypothetical protein	LR↑
	LOC_Os04g05650	expressed protein	ER ↑
	LOC_Os04g06520	expressed protein	LR↑
	LOC_Os04g08060	Zinc finger, C2H2 type family protein	LR↑
	LOC_Os04g08390	Leucine Rich Repeat family protein		LR↑
	LOC_Os04g09390	Lectin precursor		LR↑
	LOC_Os04g09530	pentatricopeptide		LR↓
	LOC_Os04g09604	Caffeic acid O-methyltransferase (EC 2.1.1.6).	LR↓
	LOC_Os04g10214	Hypothetical protein.	LR↑
	LOC_Os04g10750	phosphate:H+ symporter family protein		LR↓
	LOC_Os04g10924	Conserved hypothetical protein.		LR↓
	LOC_Os04g10940	hypothetical protein		ER↓
	LOC_Os04g11030	expressed protein	LR↓
	LOC_Os04g11970	O-methyltransferase family protein		ER↓
qCTS4-3 ,cold-induced yellowing tolerance, RM241-RM317	LOC_Os04g45730	Protein kinase domain containing protein		ER ↑
	LOC_Os04g45750	expressed protein		LR↑
	LOC_Os04g45810	Homeobox domain containing protein	ER ↑
	LOC_Os04g45834	Protein of unknown function DUF584 family protein.	LR↑
37 genes	LOC_Os04g45900	transposon protein , unclassified		LR↓
	LOC_Os04g45970	Glutamate dehydrogenase	ER ↑	ER ↑
	LOC_Os04g46020	GATA zinc finger family protein	LR↑
	LOC_Os04g46220	AP2 domain containing protein		LR↑
	LOC_Os04g46280	Nudix hydrolase 8		LR↑
	LOC_Os04g46320	Protein kinase domain containing protein	LR↑	LR↑
	LOC_Os04g46600	expressed protein		LR↑
	LOC_Os04g46620	T-complex protein 1, alpha subunit		ER↓
	LOC_Os04g46980	Cis-zeatin O-glucosyltransferase 1	ER ↑
	LOC_Os04g47190	Branched-chain-amino-acid aminotransferase 5	ER ↑	ER ↑
	LOC_Os04g47220	Aquaporin RWC3	LR↓
	LOC_Os04g47240	YDA		LR↓
	LOC_Os04g47330	Cellular retinaldehyde-binding)/triple function		LR↑
	LOC_Os04g47360	Prolyl endopeptidase		ER↓
	LOC_Os04g47520	axi 1		LR↓
	LOC_Os04g47770	Cis-zeatin O-glucosyltransferase		LR↓
	LOC_Os04g47780	Amino acid transport protein	ER ↑	ER ↑
	LOC_Os04g47870	PINHEAD protein		LR↑
	LOC_Os04g48230	dehydration-responsive family protein		LR↑
	LOC_Os04g48270	F-box family protein		ER ↑
	LOC_Os04g48290	MATE efflux protein		LR↑
	LOC_Os04g48350	CRT/DRE binding factor 1		LR↑
	LOC_Os04g48410	Copper/zinc superoxide dismutase family protein	LR↓
	LOC_Os04g48460	Cytochrome P450 family protein	ER ↑
	LOC_Os04g48730	Hypothetical protein.	ER ↑	ER ↑
	LOC_Os04g48750	3-oxo-5-alpha-steroid 4-dehydrogenase	ER↓	ER↓
	LOC_Os04g48770	Ubiquitin fusion degradation protein	LR↓
	LOC_Os04g48800	GDSL-like Lipase/Acylhydrolase family protein		LR↑
	LOC_Os04g48830	uncharacterized plant-specific domain protein		LR↑
	LOC_Os04g48850	1-aminocyclopropane-1-carboxylate synthase		ER ↑
	LOC_Os04g48860	expressed protein		LR↓
	LOC_Os04g48930	ferric-chelate reductase		ER↓
	LOC_Os04g49000	Zinc finger, C3HC4 type family protein	LR↑
qCTS4-2, cold-induced wilting tolerance, RM255-RM348	LOC_Os04g52200	RNA recognition motif family protein	LR↓
	LOC_Os04g52260	Protease inhibitor/seed storage/LTP family protein		LR↓
	LOC_Os04g52300	expressed protein		LR↓
	LOC_Os04g52504	Conserved hypothetical protein.	ER ↑	ER ↑
24 genes	LOC_Os04g52540	Piwi domain containing protein	LR↑
	LOC_Os04g52600	Protein kinase domain containing protein	ER ↑
	LOC_Os04g52670	Auxin responsive protein	ER ↑	ER ↑
	LOC_Os04g52750	expressed protein		LR↑
	LOC_Os04g52840	Protein kinase domain containing protein	ER ↑	ER ↑
	LOC_Os04g53220	Signal recognition particle 14 kDa protein		ER↓
	LOC_Os04g53606	Translation initiation factor SUI1 family protein.		LR↑
	LOC_Os04g53640	Peroxidase 1 precursor	LR↑	LR↑
	LOC_Os04g53660	hAT family dimerisation domain containing protein	LR↓
	LOC_Os04g53720	SNF2 domain-containing protein	LR↑
	LOC_Os04g53850	NAD dependent epimerase/dehydratase	ER ↑	ER ↑
	LOC_Os04g53950	Glycosyl hydrolases family 16 protein	LR↓
	LOC_Os04g53990	expressed protein	LR↑
	LOC_Os04g54200	diacylglycerol kinase	ER ↑	ER ↑
	LOC_Os04g54230	expressed protein		LR↑
	LOC_Os04g54310	Wound induced protein	ER↓
	LOC_Os04g54610	hypothetical protein		LR↑
	LOC_Os04g54620	expressed protein		LR↑
	LOC_Os04g55030	Cullin family protein		LR↓
	LOC_Os04g55180	alpha/beta hydrolase fold PF		LR↓
qCTS6-1, cold tolerance,RM253-RM50	LOC_Os06g10750	nodulin MtN21 family protein		ER↓
	LOC_Os06g10770	N-acyl-L-amino-acid amidohydrolase family protein	LR↓
	LOC_Os06g11310	Plastocyanin-like domain containing protein		ER↓
6 genes	LOC_Os06g11490	Plastocyanin-like domain containing protein	LR↓	LR↓
	LOC_Os06g11650	Phosphate-induced protein 1		LR↑
	LOC_Os06g11800	Annexin-like protein RJ4		LR↑
qCTS6-2, cold-induced wilting tolerance, RM3-RM325a	LOC_Os06g33549	Protein phosphatase 2C family protein.		LR↑
	LOC_Os06g33810	zinc finger in N-recognin family protein		LR↓
	LOC_Os06g33880	expressed protein		LR↑
	LOC_Os06g33970	VQ motif family protein		LR↑
80 genes	LOC_Os06g34020	Glycosyl hydrolases family 17 protein		LR↑
	LOC_Os06g35060	heavy metal-associated domain containing protein		LR↑
	LOC_Os06g35520	Peroxidase 52 precursor	ER ↑	ER ↑
	LOC_Os06g35540	Aspartate aminotransferase	LR↓	LR↓
	LOC_Os06g35560	Reticuline oxidase precursor	LR↓
	LOC_Os06g35620	Reticuline oxidase precursor		ER↓
	LOC_Os06g35670	expressed protein		LR↓
	LOC_Os06g35730	60S ribosomal protein L11-1	LR↓
	LOC_Os06g35814	Ras-related protein RIC2.		LR↓
	LOC_Os06g35900	BES1/BZR1 homolog protein 4	ER ↑	ER ↑
	LOC_Os06g35970	meiosis 5	LR↓
	LOC_Os06g36050	expressed protein	ER↓
	LOC_Os06g36070	expressed protein		ER↓
	LOC_Os06g36270	Leucine Rich Repeat family protein	ER ↑	ER ↑
	LOC_Os06g36390	expressed protein		LR↑
	LOC_Os06g36450	Ferroportin1 family protein	LR↓
	LOC_Os06g36590	K+ efflux antiporter		LR↑
	LOC_Os06g37020	expressed protein		LR↑
	LOC_Os06g38150	Hypothetical protein.	LR↑
	LOC_Os06g38450	Papain family cysteine protease	ER↓
	LOC_Os06g38940	Protein UNQ2508/PRO5996		LR↓
	LOC_Os06g39040	NAD dependent epimerase/dehydratase		LR↓
	LOC_Os06g39140	protozoan/cyanobacterial globin family protein	ER ↑
	LOC_Os06g39260	Adenosine 3'-phospho 5'-phosphosulfate transporter 1		ER↓
	LOC_Os06g39344	Enoyl-CoA hydratase/isomerase	LR↓
	LOC_Os06g39370	Kelch motif family protein		LR↑
	LOC_Os06g39410	hypothetical protein		LR↓
	LOC_Os06g39700	DNA-directed RNA polymerase alpha chain		LR↑
	LOC_Os06g39870	26S protease regulatory subunit 8	LR↑
	LOC_Os06g39900	Agenet domain containing protein		LR↓
	LOC_Os06g39912	Conserved hypothetical protein.		LR↓
	LOC_Os06g39960	bZIP transcription factor family protein	LR↑
	LOC_Os06g40080	heme oxygenase 1		LR↓
	LOC_Os06g40110	RNA polymerase Rpc34 subunit family protein	LR↑
	LOC_Os06g40150	AP2 domain-containing transcription factor		LR↑
	LOC_Os06g40170	Phospholipase D alpha 2		LR↑
	LOC_Os06g40180	Phospholipase D alpha 2		LR↑
	LOC_Os06g40200	Mitochondrial carrier protein	LR↑
	LOC_Os06g40360	Leucine Rich Repeat family protein		LR↑
	LOC_Os06g40370	CBL-interacting serine/threonine-protein kinase 24	LR↑
	LOC_Os06g40440	expressed protein		ER↓
	LOC_Os06g40510	CRAL/TRIO, N-terminus family protein		ER↓
	LOC_Os06g40640	Fructose-bisphosphate aldolase		ER↓
	LOC_Os06g40710	transfactor	LR↓
	LOC_Os06g40740	expressed protein		LR↑
	LOC_Os06g41770	bZIP transcription factor family protein		ER ↑
	LOC_Os06g41790	RNA recognition motif family protein	LR↑	LR↑
	LOC_Os06g42020	glycosyltransferase 5		LR↑
	LOC_Os06g42060	expressed protein	LR↓
	LOC_Os06g42850	expressed protein		LR↓
	LOC_Os06g43090	Myb-like DNA-binding domain containing protein	ER ↑	ER ↑
	LOC_Os06g43140	expressed protein		LR↓
	LOC_Os06g43190	C2 domain containing protein	LR↑
	LOC_Os06g43430	Cytochrome P450 family protein	ER↓	ER↓
	LOC_Os06g43570	Proteasome subunit beta type 3		ER↓
	LOC_Os06g43600	Protease inhibitor/seed storage/LTP family protein	ER↓
	LOC_Os06g43620	Haemolysin-III related family protein	LR↓
	LOC_Os06g43700	amino acid transporter family protein	LR↑
	LOC_Os06g43810	expressed protein	ER ↑
	LOC_Os06g43870	expressed protein	ER ↑	ER ↑
	LOC_Os06g43930	Serine carboxypeptidase S28 family protein	LR↓
	LOC_Os06g43950	expressed protein	LR↑	LR↑
	LOC_Os06g43950	expressed protein		LR↑
	LOC_Os06g43980	Hypothetical protein.		LR↑
	LOC_Os06g43990	expressed protein		ER ↑
	LOC_Os06g44050	Methyladenine glycosylase family protein		LR↑
	LOC_Os06g44150	magnesium transporter CorA-like family protein	LR↓
	LOC_Os06g44160	DnaJ domain containing protein		ER ↑
	LOC_Os06g44170	NAD dependent epimerase/dehydratase	ER ↑
	LOC_Os06g44230	DNA-directed RNA polymerase 3		ER↓
	LOC_Os06g44250	Haemolysin-III related family protein		LR↑
	LOC_Os06g44620	4-coumarate--CoA ligase 1 (EC 6.2.1.12)		ER ↑
	LOC_Os06g44840	prenyltransferase, UbiA family protein	ER↓
	LOC_Os06g44880	Type II intron maturase family protein		LR↑
	LOC_Os06g44910	Glutaredoxin family protein		ER↓
	LOC_Os06g45020	Leucine Rich Repeat family protein	LR↑
qPSST-7, reproductive stage, RM3767-RM1377	LOC_Os07g16364	Hypothetical protein.	LR↓
	LOC_Os07g16950	MAK16-like protein RBM13 A		LR↓
	LOC_Os07g17330	senescence-associated protein	LR↑	LR↑
11 genes	LOC_Os07g17689	Protein translation factor	LR↑	LR↑
	LOC_Os07g17970	AMP-binding enzyme family protein		ER↓
	LOC_Os07g18050	RNA recognition motif family protein		ER ↑
	LOC_Os07g19030	Tic22-like family protein	ER↓	ER↓
	LOC_Os07g20410	expressed protein		LR↓
	LOC_Os07g22350	Glucose-6-phosphate 1-dehydrogenase 2	LR↓
	LOC_Os07g22390	shoot gravitropism 2	LR↓	LR↓
	LOC_Os07g22650	xylulose kinase like protein		ER↓
qCTB7, booting stage, RM182–RM1132	LOC_Os07g38830	hydrolase, alpha/beta fold family protein		LR↓
	LOC_Os07g38960	Chlorophyll a-b binding protein 7		ER↓
2 genes
qCTS 8-2b, cold-induced necrosis tolerance, RM223-RM284	LOC_Os08g01090	B3 DNA binding domain containing protein	LR↑
	LOC_Os08g01170	acetyltransferase, GNAT family protein	LR↓	LR↓
	LOC_Os08g01220	Harpin-induced protein 1 containing protein	LR↓
	LOC_Os08g01290	Tubby protein	LR↑
14 genes	LOC_Os08g01360	PA domain containing protein		LR↓
	LOC_Os08g01380	Ferredoxin-1, chloroplast precursor		LR↓
	LOC_Os08g01420	PHD-finger family protein	LR↑	LR↑
	LOC_Os08g01430	F-box domain containing protein	LR↑
	LOC_Os08g01610	GDP-mannose transporter	ER ↑	ER ↑
	LOC_Os08g01670	pectinesterase inhibitor domain containing protein	ER ↑
	LOC_Os08g01740	VHS domain containing protein	LR↑
	LOC_Os08g01760	oxidoreductase	LR↓
	LOC_Os08g01770	Adenylate kinase, chloroplast	ER↓	ER↓
	LOC_Os08g01780	AUX/IAA family protein	LR↓	LR↓
qCTS 8-2b, cold-induced necrosis tolerance, RM223-RM284	LOC_Os08g33320	expressed protein	LR↑
	LOC_Os08g33380	expressed protein	ER↓	ER↓
	LOC_Os08g33460	expressed protein	ER↓	ER↓
	LOC_Os08g33540	ATP-dependent Clp protease adaptor protein		ER↓
8 genes	LOC_Os08g33640	expressed protein	LR↑
	LOC_Os08g33650	expressed protein		LR↑
	LOC_Os08g33710	Extracellular ribonuclease LE precursor	LR↑
	LOC_Os08g33750	myb-like DNA-binding domain		ER↓
qCTS8-1, cold tolerance, RM284-RM230	LOC_Os08g33820	Chlorophyll a-b binding protein 4	LR↓
	LOC_Os08g33920	60S ribosomal protein L34	LR↓	LR↓
	LOC_Os08g34020	exostosin family protein		LR↓
65 genes	LOC_Os08g34060	expressed protein	LR↑
	LOC_Os08g34170	CAF1 family ribonuclease containing protein		LR↑
	LOC_Os08g34280	NAD dependent epimerase/dehydratase		ER↓
	LOC_Os08g34510	expressed protein		LR↑
	LOC_Os08g34600	transposon protein		LR↑
	LOC_Os08g34720	D-3-phosphoglycerate dehydrogenase	LR↓	LR↓
	LOC_Os08g34950	phosphatidylinositol-4-phosphate 5-kinase		LR↑
	LOC_Os08g34970	Sec34-like family protein		LR↓
	LOC_Os08g35020	retrotransposon protein , unclassified	LR↑
	LOC_Os08g35110	auxin-responsive protein		LR↑
	LOC_Os08g35160	DnaJ domain containing protein	ER ↑	ER ↑
	LOC_Os08g35420	Photosystem Q		LR↑
	LOC_Os08g35470	Exo70 exocyst complex subunit family protein	LR↑
	LOC_Os08g35480	Protein of unknown function containing protein		LR↓
	LOC_Os08g35620	RSH2		LR↓
	LOC_Os08g35710	expressed protein	ER↓	ER↓
	LOC_Os08g36150	Protein of unknown function containing protein	LR↓	LR↓
	LOC_Os08g36310	Cytochrome P450 family protein		LR↓
	LOC_Os08g36320	Glutamate decarboxylase	ER ↑
	LOC_Os08g36630	Eukaryotic-type carbonic anhydrase family protein		LR↑
	LOC_Os08g36910	Alpha-amylase isozyme 3D precursor	ER ↑	ER ↑
	LOC_Os08g36920	AP2 domain containing protein	ER ↑	ER ↑
	LOC_Os08g37040	esterase	LR↓
	LOC_Os08g37115	Hypothetical protein.	ER ↑
	LOC_Os08g37260	expressed protein		LR↑
	LOC_Os08g37280	PWWP domain containing protein		LR↓
	LOC_Os08g37310	Uncharacterized protein	LR↓	LR↓
	LOC_Os08g37432	Multi antimicrobial extrusion protein		ER↓
	LOC_Os08g37690	expressed protein		ER ↑
	LOC_Os08g37830	Phosphate-induced protein 1		LR↑
	LOC_Os08g37904	Zn-finger, C2H2 type domain containing protein.	LR↓
	LOC_Os08g37920	Zinc finger, C2H2 type family protein		ER ↑
	LOC_Os08g37940	HAD-superfamily hydrolase	ER↓	ER↓
	LOC_Os08g37960	transposon protein , CACTA, En/Spm sub-class		LR↑
	LOC_Os08g38060	Zinc finger, C3HC4 type family protein	LR↑
	LOC_Os08g38210	Helix-loop-helix DNA-binding domain	ER ↑	ER ↑
	LOC_Os08g38220	Dof domain, zinc finger family protein	ER ↑	ER ↑
	LOC_Os08g38300	Histone H2B	ER↓
	LOC_Os08g38460	Zinc finger, C3HC4 type family protein		ER ↑
	LOC_Os08g38710	Raffinose synthase or seed imbibition protein Sip1		ER ↑
	LOC_Os08g38720	Cytochrome oxidase assembly protein	LR↑
	LOC_Os08g38780	CCAAT-box binding factor HAP5 homolog		LR↓
	LOC_Os08g38820	Endomembrane protein 70 containing protein	ER↓	ER↓
	LOC_Os08g38910	O-methyltransferase family protein		LR↑
	LOC_Os08g39060	Leucine Rich Repeat family protein	LR↑
	LOC_Os08g39080	peroxisomal targeting signal 1 receptor	LR↑
	LOC_Os08g39150	Phosphoribosylglycinamide formyltransferase	LR↓	LR↓
	LOC_Os08g39290	EF hand family protein		LR↑
	LOC_Os08g39350	Glycerophosphoryl diester phosphodiesterase family protein	LR↓
	LOC_Os08g39430	expressed protein	LR↓
	LOC_Os08g39450	Multiple stress-responsive zinc-finger protein ISAP1	ER ↑	ER ↑
	LOC_Os08g39640	Cytochrome P450 family protein		ER ↑
	LOC_Os08g39820	expressed protein		LR↓
	LOC_Os08g39980	Bromodomain containing protein	ER ↑	ER ↑
	LOC_Os08g40160	thylakoid lumen protein, chloroplast precursor		LR↓
	LOC_Os08g40180	3-hydroxy-3-methylglutaryl-coenzyme A reductase 3		LR↑
	LOC_Os08g40200	serine/threonine protein phosphatase	LR↑
	LOC_Os08g40430	mitochondrial transcription termination factor		ER↓
	LOC_Os08g40510	expressed protein		LR↑
	LOC_Os08g40530	Calcium-transporting ATPase 9	ER ↑
	LOC_Os08g40560	C2H2 zinc-finger protein	LR↑
	LOC_Os08g40590	Oxysterol-binding protein	LR↑
qPSST-9, reproductive stage, RM24427-RM24545	LOC_Os09g26999	Hypothetical protein.		LR↑
	LOC_Os09g27030	Cysteine proteinase 2 precursor		LR↓
	LOC_Os09g27050	RSH2	ER ↑	ER ↑
	LOC_Os09g27080	Plant protein family protein	ER ↑
20 genes	LOC_Os09g27330	expressed protein	LR↑
	LOC_Os09g27610	hypothetical protein		ER↓
	LOC_Os09g27970	hypothetical protein	LR↓	LR↓
	LOC_Os09g28000	signal peptidase I family protein	ER ↑	ER ↑
	LOC_Os09g28230	2-Hydroxyisoflavanone dehydratase	ER ↑
	LOC_Os09g28310	bZIP transcription factor family protein		LR↓
	LOC_Os09g28354	Heat stress transcription factor Spl7		ER ↑
	LOC_Os09g28440	AP2 domain containing protein		ER ↑
	LOC_Os09g28570	oxidoreductase		LR↓
	LOC_Os09g28620	esterase	LR↓	LR↓
	LOC_Os09g28650	esterase	ER↓
	LOC_Os09g28690	2-Hydroxyisoflavanone dehydratase	LR↓
	LOC_Os09g28810	RNA recognition motif family protein		LR↑
	LOC_Os09g28890	transposon protein , CACTA, En/Spm sub-class	LR↓
	LOC_Os09g29080	expressed protein	ER↓	ER↓
	LOC_Os09g29100	Cyclin delta-2
qCTB9, Spikelet fertility, RM257–RM242	LOC_Os09g29170	Protein kinase domain containing protein	LR↑
	LOC_Os09g29200	Glutathione S-transferase		ER↓
	LOC_Os09g29239	Protein of unknown function DUF250		LR↓
14 genes	LOC_Os09g29404	Isoamylase-type starch debranching enzyme ISO3.		ER↓
	LOC_Os09g29460	Homeobox associated leucine zipper family protein		LR↓
	LOC_Os09g29490	Peroxidase 17 precursor		ER ↑
	LOC_Os09g29930	Helix-loop-helix DNA-binding domain	LR↑
	LOC_Os09g30120	cellulose synthase-like protein CslE		ER↓
	LOC_Os09g30340	Photosystem I reaction center subunit V	LR↓
	LOC_Os09g30350	expressed protein	LR↑
	LOC_Os09g30414	Peptidase A1, pepsin family protein.		ER ↑
	LOC_Os09g30454	OsWAK87 - OsWAK receptor-like protein kinase	LR↑
	LOC_Os09g30490	EF hand family protein	ER ↑	ER ↑
	LOC_Os09g31080	expressed protein	ER↓
qCTS11-2, cold-induced necrosis tolerance, RM254-RM330a	LOC_Os11g40610	early flowering 4		ER↓
	LOC_Os11g41034	Hypothetical protein.	LR↓
	LOC_Os11g41150	expressed protein	LR↓
	LOC_Os11g41170	Leucine Rich Repeat family protein	LR↑
12 genes	LOC_Os11g41600	expressed protein		ER↓
	LOC_Os11g41610	40S ribosomal protein S29	LR↓	LR↓
	LOC_Os11g41820	U2 snRNP auxilliary factor, large subunit	LR↓
	LOC_Os11g41870	Sugar transporter family protein	LR↑
	LOC_Os11g41890	RNA-binding region RNP-1 domain containing protein.		ER↓
	LOC_Os11g41990	Armadillo/beta-catenin-like repeat family protein		LR↑
	LOC_Os11g42350	glutathione synthetase family protein	LR↓	LR↓
	LOC_Os11g42490	retrotransposon protein , unclassified		ER↓
qCTS12a, cold-induced necrosis tolerance, RM101-RM292	LOC_Os12g16220	Isoflavone reductase homolog		LR↓
	LOC_Os12g16260	Isoflavone reductase homolog	LR↓
	LOC_Os12g16350	3-hydroxyisobutyryl-coenzyme A hydrolase	LR↑
	LOC_Os12g16524	Non-protein coding transcript	LR↓	LR↓
4 genes
qCTB8, booting stage,RM5647-PLA61	LOC_Os08g05510	myb-like DNA-binding domain		ER ↑
	LOC_Os08g05570	Monodehydroascorbate reductase	LR↓	LR↓
	LOC_Os08g05530	small nuclear ribonucleoprotein E	LR↓	LR↓
4 genes	LOC_Os08g05490	tyrosyl-tRNA synthetase family protein	LR↓
LTH, booting stage, RM3719-RM7000	LOC_Os03g57310	Syntaxin 121, putative, expressed	ER ↑	ER ↑
	LOC_Os03g57420	ML domain protein, putative, expressed	LR↓
	LOC_Os03g57450	Calcium-dependent protein kinase, isoform AK1	ER ↑	ER ↑
37 genes	LOC_Os03g57640	PrMC3, putative, expressed		LR↑
	LOC_Os03g57660	glutamate carboxypeptidase II	ER ↑	ER ↑
	LOC_Os03g57750	expressed protein	LR↑
	LOC_Os03g57880	Glucan endo-1,3-beta-glucosidase 5 precursor	ER ↑
	LOC_Os03g57880	Glucan endo-1,3-beta-glucosidase 5 precursor	ER ↑
	LOC_Os03g57890	AN1-like Zinc finger family protein, expressed		LR↓
	LOC_Os03g58010	acetyltransferase, GNAT family protein	ER ↑
	LOC_Os03g58040	Glutamate dehydrogenase	LR↑	LR↑
	LOC_Os03g58090	expressed protein		ER↓
	LOC_Os03g58100	pentatricopeptide, putative, expressed	LR↑	LR↑
	LOC_Os03g58110	Leucine Rich Repeat family protein, expressed		LR↑
	LOC_Os03g58250	bZIP transcription factor family protein		ER ↑
	LOC_Os03g58300	Indole-3-glycerol phosphate lyase	ER↓
	LOC_Os03g58350	AUX/IAA family protein, expressed		LR↓
	LOC_Os03g58410	PRA1 family protein, expressed	LR↑
	LOC_Os03g58470	linker histone H1 and H5 family protein, expressed		ER↓
	LOC_Os03g58530	ES43, putative, expressed	LR↓
	LOC_Os03g58540	GTP1/OBG family protein, expressed	ER↓	ER↓
	LOC_Os03g58580	nodulin family protein, putative, expressed		LR↓
	LOC_Os03g58610	expressed protein		LR↓
	LOC_Os03g58610	expressed protein		LR↓
	LOC_Os03g58630	Thioredoxin H-type 5		ER↓
	LOC_Os03g58740	expressed protein	ER ↑	ER ↑
	LOC_Os03g58790	ATPase 2, putative, expressed	ER ↑	ER ↑
	LOC_Os03g58850	expressed protein		LR↑
	LOC_Os03g58920	galactosyltransferase family protein		ER ↑
	LOC_Os03g58970	expressed protein	LR↓	LR↓
	LOC_Os03g59010	Germin-like protein subfamily T member 1 precursor		LR↓
	LOC_Os03g59070	phosphatidic acid phosphatase family protein	ER ↑
	LOC_Os03g59170	adenosine 5'-phosphosulfate reductase 8	LR↑
	LOC_Os03g59180	expressed protein	ER ↑
	LOC_Os03g59300	expressed protein	LR↓
	Os03g0792500	MATH domain containing protein	LR↓	LR↓
	Os03g0802200	Hypothetical protein.	ER ↑
* Note: ER and LR indicate eary response and late response to chilling stress, respectively; symbol ↑ and ↓ indicate up- and down-regulated by chilling stress, respectively.
